# Supplementary material for: Ras signaling regulates osteoprogenitor cell proliferation and bone formation
Source: PubMed Central journal article supplement (PMC5133981; doi:10.1038/cddis.2016.314), 2016-10-13

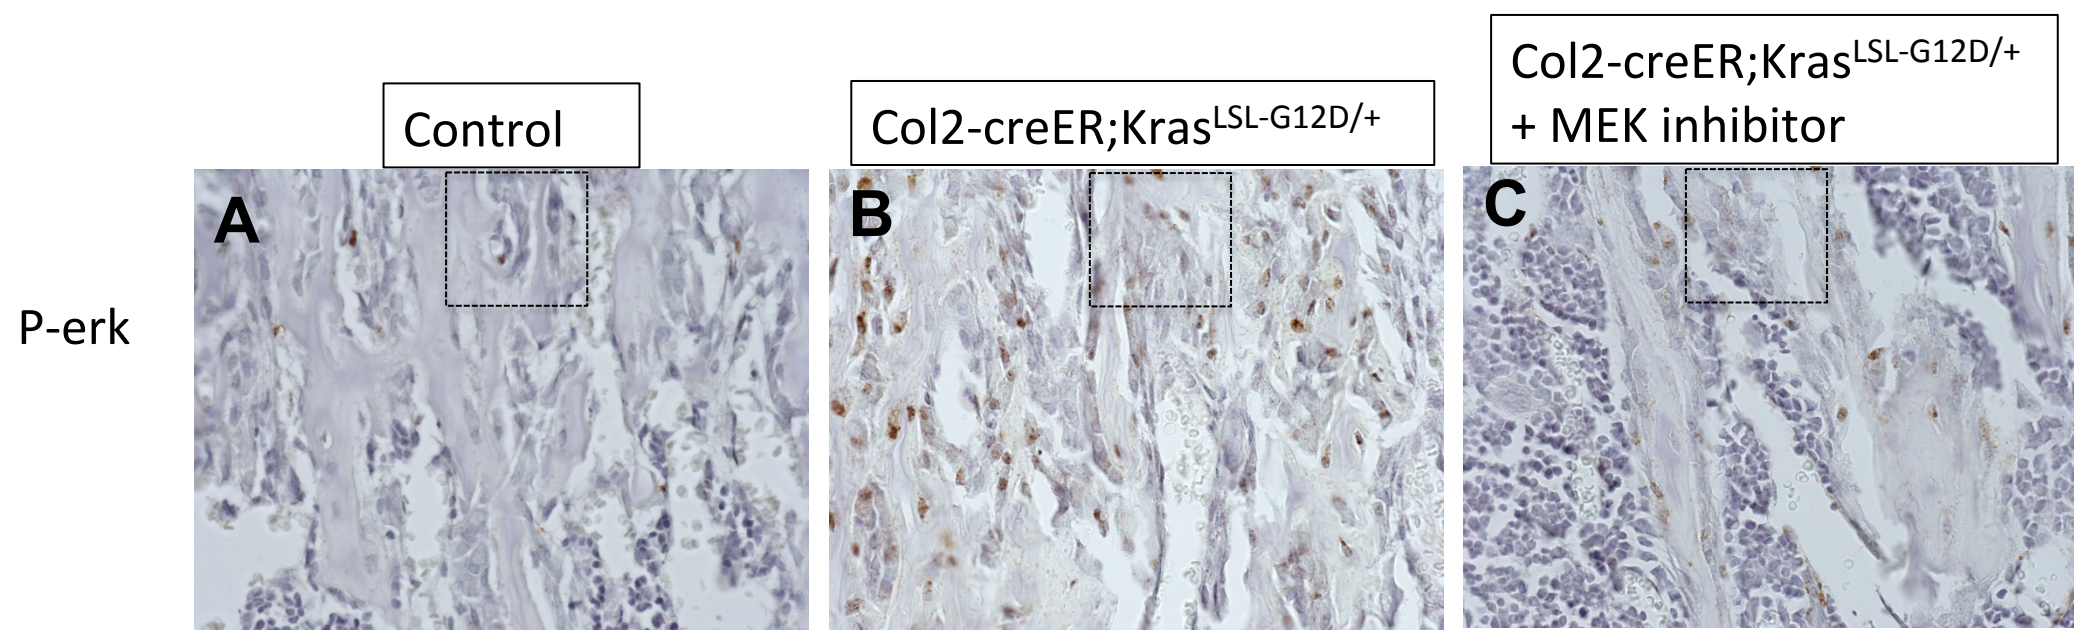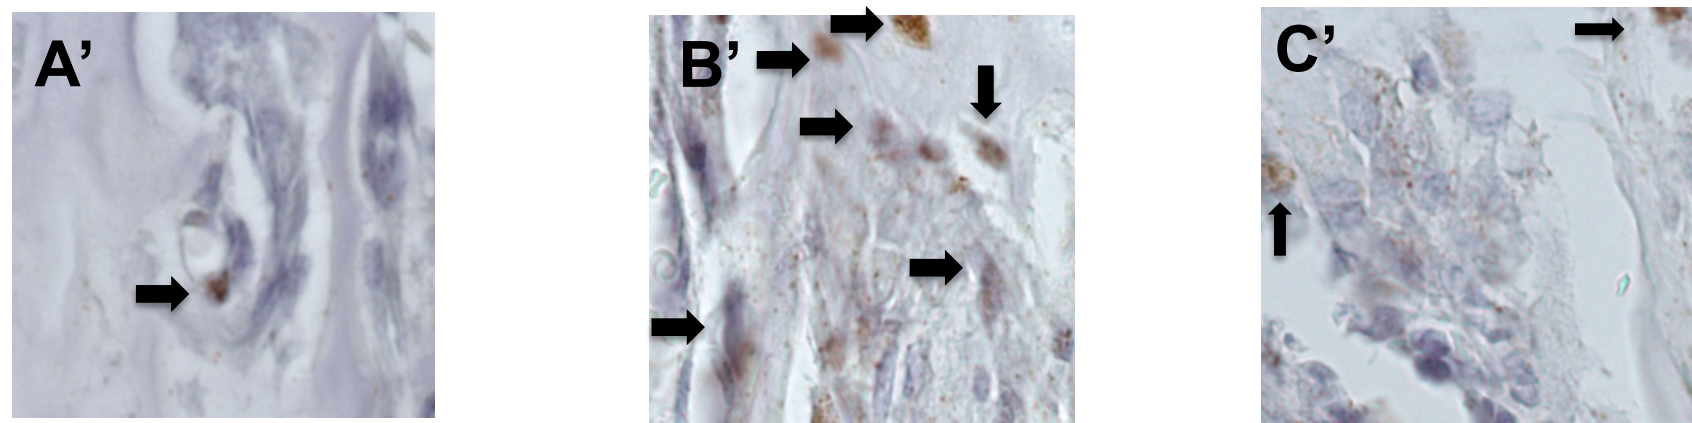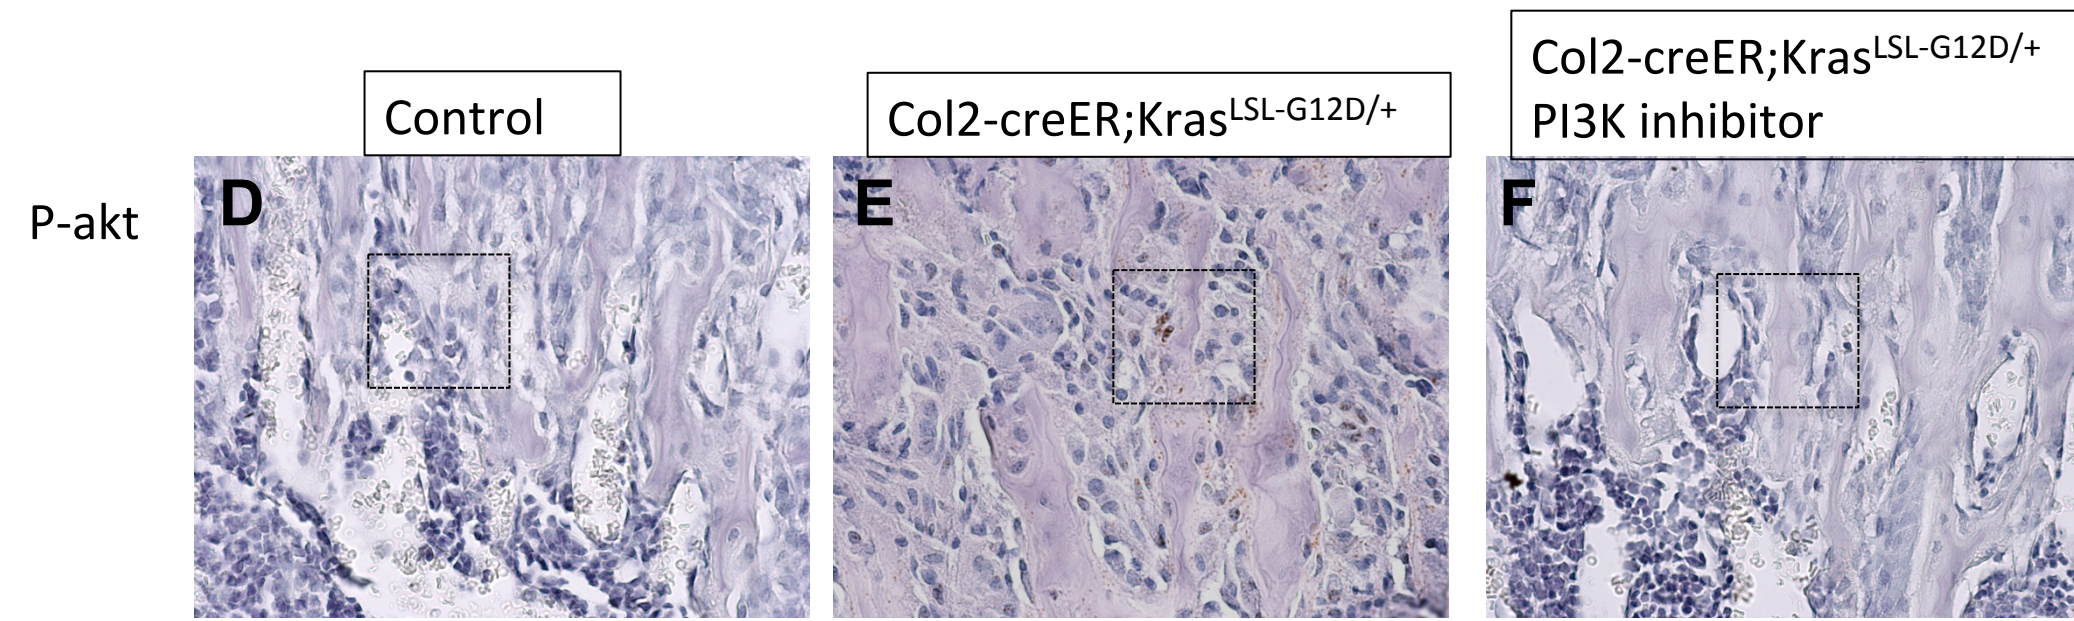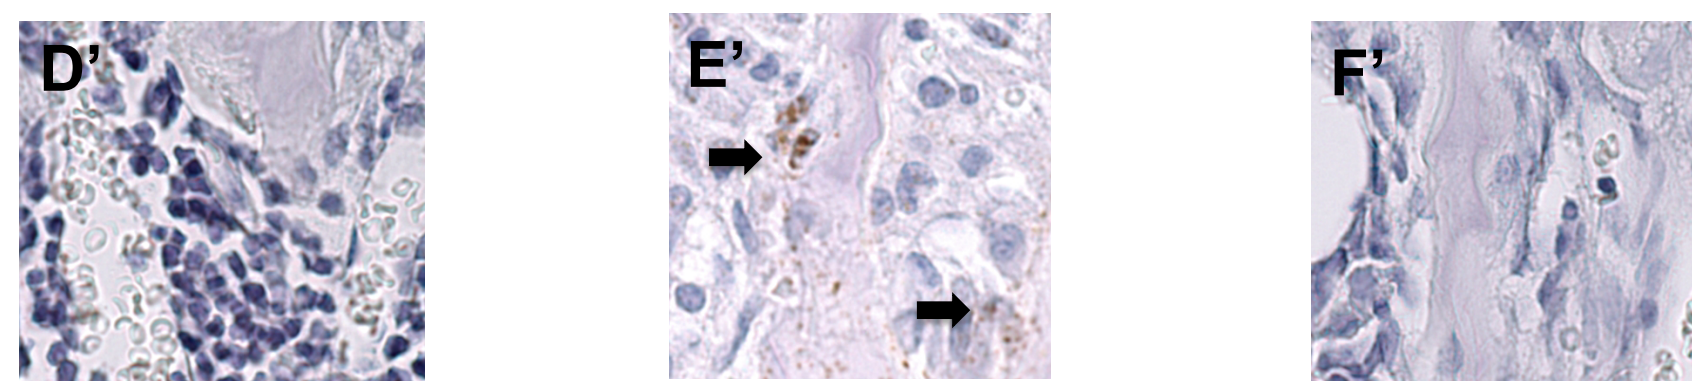

Supplement: cddis2016314x4.pdf [file cddis2016314x4.pdf]
